# Supplementary material
Source: Research Square preprint supplement (doi:10.21203/rs.3.rs-9781289/v1)
Supplement: Supplementary file 1 [file 1b0c8c1144d8b79c9a702d21.docx]

# Appendix A:Mathematical Derivation of Growth Coefficients

The growth projections utilize the standard Hanushek-Woessmann endogenous growth model:

Where:

- is the annual growth rate of real GDP per capita.
- is the measure of cognitive skills (test scores).
- is the growth coefficient (estimated at for this study).

A 25-point increase on the PISA scale represents 0.25 standard deviations (). Therefore:

# Appendix B: Sensitivity Analysis Matrix

The following table outlines the sensitivity of the GDP growth projection to variations in the Growth Coefficient () and the Implementation Fidelity ().

Impact of Fidelity and Growth Coefficient on GDP

|  | **Low Coefficient** | **Base Coefficient** | **High Coefficient** |
| --- | --- | --- | --- |
| **Implementation Fidelity ()** | () | () | () |
| Low (15 pts / 0.15 SD) | +0.15% GDP | +0.225% GDP | +0.30% GDP |
| Moderate (25 pts / 0.25 SD) | +0.25% GDP | +0.375% GDP | +0.50% GDP |
| High (40 pts / 0.40 SD) | +0.40% GDP | +0.60% GDP | +0.80% GDP |

This matrix demonstrates that even under the most conservative assumptions (Low Fidelity, Low Coefficient), the intervention yields a positive impact on growth (+0.15%), confirming the robustness of the investment case.
